# Supplementary material for: THE THEORY OF STRONG INTERACTIONS AND COSMIC RAYS
Source: MDPI journal article supplement (doi:10.3390/cimb45010037), 1964-11-01
Supplement: s1 [file s1]

Table S1 The potential therapeutic targets of wogonin against PH

| Symbol   | Name                                                | Category | Gene Id |
|----------|-----------------------------------------------------|----------|---------|
| ADIPOQ   | adiponectin, C1Q and collagen domain                | Protein  | 9370    |
|          | containing                                          | Coding   |         |
| ALB      | albumin                                             | Protein  | 213     |
|          |                                                     | Coding   |         |
| ARG1     | arginase 1                                          | Protein  | 383     |
|          |                                                     | Coding   |         |
| BCL2     | BCL2 apoptosis regulator                            | Protein  | 596     |
|          |                                                     | Coding   |         |
| BCL2L1   | BCL2 like 1                                         | Protein  | 598     |
|          |                                                     | Coding   |         |
| CASP3    | caspase 3                                           | Protein  | 836     |
|          |                                                     | Coding   |         |
| CAT      | catalase                                            | Protein  | 847     |
|          |                                                     | Coding   |         |
| CAV1     | caveolin 1                                          | Protein  | 857     |
|          |                                                     | Coding   |         |
| CCL2     | C-C motif chemokine ligand 2                        | Protein  | 6347    |
|          |                                                     | Coding   |         |
| CDKN1A   | cyclin dependent kinase inhibitor 1A                | Protein  | 1026    |
|          |                                                     | Coding   |         |
| CDKN1B   | cyclin dependent kinase inhibitor 1B                | Protein  | 1027    |
|          |                                                     | Coding   |         |
| CXCL8    | C-X-C motif chemokine ligand 8                      | Protein  | 3576    |
|          |                                                     | Coding   |         |
| CYP1A1   | cytochrome P450 family 1 subfamily A member 1       | Protein  | 1543    |
|          |                                                     | Coding   |         |
| EGFR     | epidermal growth factor receptor                    | Protein  | 1956    |
|          |                                                     | Coding   |         |
| ELANE    | elastase, neutrophil expressed                      | Protein  | 1991    |
|          |                                                     | Coding   |         |
| ESR2     | estrogen receptor 2                                 | Protein  | 2100    |
|          |                                                     | Coding   |         |
| FGFR1    | fibroblast growth factor receptor 1                 | Protein  | 2260    |
|          |                                                     | Coding   |         |
| HIF1A    | hypoxia inducible factor 1 subunit alpha            | Protein  | 3091    |
|          |                                                     | Coding   |         |
| HMGB1    | high mobility group box 1                           | Protein  | 3146    |
|          |                                                     | Coding   |         |
| HSP90AA1 | heat shock protein 90 alpha family class A member 1 | Protein  | 3320    |
|          |                                                     | Coding   |         |
| IL1B     | interleukin 1 beta                                  | Protein  | 3553    |

|       |                                                          |                   |      |
|-------|----------------------------------------------------------|-------------------|------|
| IL6   | interleukin 6                                            | Coding<br>Protein | 3569 |
| JAK2  | Janus kinase 2                                           | Coding<br>Protein | 3717 |
| JUN   | Jun proto-oncogene, AP-1 transcription<br>factor subunit | Coding<br>Protein | 3725 |
| KDR   | kinase insert domain receptor                            | Coding<br>Protein | 3791 |
| KIT   | KIT proto-oncogene, receptor tyrosine<br>kinase          | Coding<br>Protein | 3815 |
| MAPK1 | mitogen-activated protein kinase 1                       | Coding<br>Protein | 5594 |
| MAPK3 | mitogen-activated protein kinase 3                       | Coding<br>Protein | 5595 |
| MME   | membrane metalloendopeptidase                            | Coding<br>Protein | 4311 |
| MMP2  | matrix metalloproteinase 2                               | Coding<br>Protein | 4313 |
| MMP9  | matrix metalloproteinase 9                               | Coding<br>Protein | 4318 |
| MYC   | MYC proto-oncogene, bHLH transcription<br>factor         | Coding<br>Protein | 4609 |
| NFKB1 | nuclear factor kappa B subunit 1                         | Coding<br>Protein | 4790 |
| NOS2  | nitric oxide synthase 2                                  | Coding<br>Protein | 4843 |
| PPARG | peroxisome proliferator activated receptor<br>gamma      | Coding<br>Protein | 5468 |
| PTGS2 | prostaglandin-endoperoxide synthase 2                    | Coding<br>Protein | 5743 |
| RELA  | RELA proto-oncogene, NF-kB subunit                       | Coding<br>Protein | 5970 |
| STAT3 | signal transducer and activator of<br>transcription 3    | Coding<br>Protein | 6774 |
| TNF   | tumor necrosis factor                                    | Coding<br>Protein | 7124 |
| TP53  | tumor protein p53                                        | Coding<br>Protein | 7157 |

---
